# Supplementary material for: Following Evidence-Based Recommendations for Perioperative Pain Management after Cesarean Section Is Associated with Better Pain-Related Outcomes: Analysis of Registry Data
Source: MDPI journal article supplement (doi:10.3390/jcm12020676), 2023-01-14
Supplement: s1 [file s1]

# SUPPLEMENT I

## Contents

|                     |                                                                                                                                          |   |
|---------------------|------------------------------------------------------------------------------------------------------------------------------------------|---|
| <b>S-I-Table S1</b> | Sources that formed the basis for selecting the elements of care – as described in Section 2.3 of the manuscript                         | 2 |
| <b>S-I-Table S2</b> | Single doses and maximum daily doses for non-opioid medications<br>Example of calculating the “full daily dose” of non-opioid analgesics | 3 |
| <b>S-I-Table S3</b> | Countries from which women were surveyed                                                                                                 | 4 |
| <b>S-I-Table S4</b> | Details on the type of anesthesia in the cohort                                                                                          | 5 |
| <b>S-I-Table S5</b> | Descriptive statistics of the patient-reported outcomes for the ‘Care’ groups in the total cohort                                        | 6 |
| <b>References</b>   |                                                                                                                                          | 8 |

**S-I-Table S1** Sources which formed the basis for selecting the elements of care – as described in Section 2.3 of the manuscript

| <b>Intervention</b><br><b>Source</b>               | <b>Sutton &amp; Carvalho [1]</b> | <b>PROSEPCT [2]</b> | <b>Acute Pain Management: Scientific Evidence [3]</b> | <b>Chou et al [4]</b> | <b>Royal College of Anaesthetists [5]</b> | <b>NICE [6]</b> | <b>ASA Task Force on Obstetric Anesthesia [7]</b> | <b>Grape et al [8]</b> | <b>Bamigboye &amp; Hofmeyr [9]</b> |
|----------------------------------------------------|----------------------------------|---------------------|-------------------------------------------------------|-----------------------|-------------------------------------------|-----------------|---------------------------------------------------|------------------------|------------------------------------|
| <b>Pre / intra-operative</b>                       |                                  |                     |                                                       |                       |                                           |                 |                                                   |                        |                                    |
| Regional (spinal or epidural) – opioid, any        |                                  |                     |                                                       | x                     |                                           |                 | x                                                 |                        |                                    |
| Regional (spinal or epidural) – long acting opioid | x                                | x                   | x                                                     |                       | x                                         | x               |                                                   |                        |                                    |
| General anesthesia (GA): wound infiltration / TAP  | x                                |                     | x                                                     | x                     |                                           |                 |                                                   | x                      | x                                  |
| GA addressed                                       |                                  |                     |                                                       |                       |                                           | x               |                                                   |                        |                                    |
| Paracetamol & NSAID intra-op                       | x                                | X                   | x                                                     |                       |                                           | x               |                                                   |                        |                                    |
| <b>After surgery</b>                               |                                  |                     |                                                       |                       |                                           |                 |                                                   |                        |                                    |
| NSAID                                              |                                  |                     |                                                       |                       | x                                         |                 |                                                   |                        |                                    |
| Paracetamol & NSAID                                | x                                | x                   | x                                                     | x                     |                                           | x               |                                                   |                        |                                    |
| Opioid, as rescue                                  | x                                | x                   | x                                                     | x                     | x                                         | x               |                                                   |                        |                                    |
| Pain assessment                                    | x                                | x                   | x                                                     | x                     | x                                         | x               |                                                   |                        |                                    |

These are references published before or during the study's time period. Clinicians taking part in the study could have used these as references.

**S-I-Table S2.** Doses used to calculate sufficient single and cumulative daily doses [10,11]

| drug           | daily dose [mg] | single dose [mg] |
|----------------|-----------------|------------------|
| celecoxib      | 200             | 200              |
| clonixin       | 600             | 200              |
| dexketoprofen  | 150             | 50               |
| diclofenac     | 150             | 75               |
| etoricoxib     | 120             | 60               |
| flurbiprofen   | 300             | 50               |
| ibuprofen      | 2400            | 400              |
| indometacin    | 150             | 50               |
| ketoprofen     | 150             | 50               |
| ketorolac      | 150             | 30               |
| mefenamic acid | 1250            | 500              |
| metamizol      | 4000            | 500              |
| naproxen       | 1000            | 500              |
| nefopam        | 90              | 30               |
| paracetamol    | 4000            | 500              |
| parecoxib      | 80              | 40               |

**Example of calculating the “full daily dose” of non-opioid analgesics:**

|                                                | patient received            | daily dose | % of daily dose |
|------------------------------------------------|-----------------------------|------------|-----------------|
| intraoperative                                 | 50 mg ketoprofen            | 150 mg     | 33 %            |
|                                                | 1000 mg paracetamol         | 4000 mg    | 25 %            |
| PACU                                           | 50 mg indometacine          | 150 mg     | 33 %            |
| normal ward                                    | 2000 mg paracetamol         | 4000 mg    | 50 %            |
| <b>total:</b>                                  |                             |            | <b>141 %</b>    |
| start of surgery                               | 01.01.2019 08:15            |            |                 |
| time of survey                                 | 02.01.2019 14:30            |            |                 |
| $\Delta$ time                                  | 30.25 hours                 |            |                 |
| <b><math>\Delta</math> time (in % of days)</b> | <b>126% (i.e. 30.25/24)</b> |            |                 |

The total percentage of daily doses (141%) is larger compared to the “standardized” time between start of surgery until time of survey (126%). Thus, the treatment element was regarded as fulfilled.

**S-I-Table-S3.** Countries from which women were surveyed:

|                                         |                  | number of wards |
|-----------------------------------------|------------------|-----------------|
| <b>High income countries:</b>           | Switzerland      | 5               |
|                                         | Germany          | 2               |
|                                         | Israel           | 2               |
|                                         | France           | 1               |
|                                         | Belgium          | 1               |
|                                         | Saudi-Arabia     | 1               |
|                                         | China: Hong Kong | 1               |
| <b>Middle and low income countries:</b> | China            | 2               |
|                                         | South Africa     | 2               |
|                                         | Serbia           | 1               |
|                                         | Colombia         | 1               |
|                                         | Malaysia         | 1               |
|                                         | Philippines      | 1               |
|                                         | Indonesia        | 1               |
|                                         | Kosovo           | 1               |
|                                         | Rwanda           | 1               |

**S-I-Table S4.** Anaesthesia techniques employed in the care groups

| Type                | Specification            | regional anaesthesia group |      | combined group |      | all women with regional anaesthesia |      |
|---------------------|--------------------------|----------------------------|------|----------------|------|-------------------------------------|------|
|                     |                          | n = 4,428                  |      | n = 113        |      | n = 4,541                           |      |
|                     |                          | N                          | %    | n              | %    | n                                   | %    |
| Spinal              | Only                     | 3,879                      | 87.6 | 63             | 55.8 | 3,942                               | 86.8 |
|                     | including others and TAP | 3,883                      | 87.7 | 64             | 56.6 | 3,947                               | 86.9 |
| Epidural            | Only                     | 386                        | 8.7  | 47             | 41.6 | 433                                 | 9.5  |
|                     | including others and TAP | 387                        | 8.7  | 47             | 41.6 | 434                                 | 9.6  |
| Spinal and epidural | Only                     | 158                        | 3.6  | 1              | 0.9  | 159                                 | 3.5  |
|                     | including TAP            | 158                        | 3.6  | 2              | 1.8  | 160                                 | 3.5  |
| Spinal              | any combination          | 4,041                      | 91.3 | 66             | 58.4 | 4,107                               | 90.4 |
| Epidural            | any combination          | 545                        | 12.3 | 49             | 43.4 | 594                                 | 13.1 |

**S-I-Table S5.** Descriptive statistics of patient reported outcomes **for the ‘Care’ groups in the total cohort (n = 5,182)**. Results are shown for women in the ‘Incomplete’ care group (‘Incomplete’, n = 3,251), women with intra-operative care only (Intra-operative, n = 190), women with postoperative care only (Post-operative, n = 722) and women with ‘Full’ care (Full, n = 1,019).

| variable                                                           | protocol group  | n     | %    | 95% CI |      |
|--------------------------------------------------------------------|-----------------|-------|------|--------|------|
| <b>worst pain intensity <math>\geq 7/10</math> NRS</b>             | Incomplete      | 1,950 | 60.0 | 58.3   | 61.7 |
|                                                                    | Intra-operative | 102   | 53.7 | 46.3   | 60.9 |
|                                                                    | Post-operative  | 411   | 56.9 | 53.2   | 60.6 |
|                                                                    | Full            | 505   | 49.6 | 46.4   | 52.7 |
| <b>time in severe pain <math>\geq 50</math> %</b>                  | Incomplete      | 1,745 | 53.7 | 51.9   | 55.4 |
|                                                                    | Intra-operative | 81    | 42.6 | 35.5   | 50.0 |
|                                                                    | Post-operative  | 232   | 32.1 | 28.7   | 35.7 |
|                                                                    | Full            | 280   | 27.5 | 24.8   | 30.3 |
| <b>interference: in bed <math>\geq 6/10</math> NRS</b>             | Incomplete      | 1,809 | 55.6 | 53.9   | 57.4 |
|                                                                    | Intra-operative | 108   | 56.8 | 49.5   | 64.0 |
|                                                                    | Post-operative  | 462   | 64.0 | 60.4   | 67.5 |
|                                                                    | Full            | 508   | 49.9 | 46.7   | 53.0 |
| <b>interference: breathing/coughing <math>\geq 5/10</math> NRS</b> | Incomplete      | 1,650 | 50.8 | 49.0   | 52.5 |
|                                                                    | Intra-operative | 99    | 52.1 | 44.8   | 59.4 |
|                                                                    | Post-operative  | 424   | 58.7 | 55.0   | 62.3 |
|                                                                    | Full            | 534   | 52.4 | 49.3   | 55.5 |
| <b>interference: sleep <math>\geq 5/10</math> NRS</b>              | Incomplete      | 1,512 | 46.5 | 44.8   | 48.2 |
|                                                                    | Intra-operative | 81    | 42.6 | 35.5   | 50.0 |
|                                                                    | Post-operative  | 306   | 42.4 | 38.7   | 46.1 |
|                                                                    | Full            | 362   | 35.5 | 32.6   | 38.6 |
| <b>anxiety <math>\geq 4/10</math> NRS</b>                          | Incomplete      | 1,615 | 49.7 | 47.9   | 51.4 |
|                                                                    | Intra-operative | 75    | 39.5 | 32.5   | 46.8 |
|                                                                    | Post-operative  | 274   | 38.0 | 34.4   | 41.6 |
|                                                                    | Full            | 282   | 27.7 | 24.9   | 30.5 |
| <b>helplessness <math>\geq 4/10</math> NRS</b>                     | Incomplete      | 1,620 | 49.8 | 48.1   | 51.6 |
|                                                                    | Intra-operative | 67    | 35.3 | 28.5   | 42.5 |
|                                                                    | Post-operative  | 292   | 40.4 | 36.8   | 44.1 |
|                                                                    | Full            | 248   | 24.3 | 21.7   | 27.1 |
| <b>dizziness <math>\geq 4/10</math> NRS</b>                        | Incomplete      | 1,144 | 35.2 | 33.5   | 36.9 |
|                                                                    | Intra-operative | 57    | 30.0 | 23.6   | 37.1 |
|                                                                    | Post-operative  | 199   | 27.6 | 24.3   | 31.0 |
|                                                                    | Full            | 272   | 26.7 | 24.0   | 29.5 |
| <b>drowsiness <math>\geq 5/10</math> NRS</b>                       | Incomplete      | 928   | 28.5 | 27.0   | 30.1 |
|                                                                    | Intra-operative | 61    | 32.1 | 25.5   | 39.2 |
|                                                                    | Post-operative  | 186   | 25.8 | 22.6   | 29.1 |
|                                                                    | Full            | 289   | 28.4 | 25.6   | 31.2 |
| <b>itch <math>\geq 3/10</math> NRS</b>                             | Incomplete      | 720   | 22.1 | 20.7   | 23.6 |
|                                                                    | Intra-operative | 71    | 37.4 | 30.5   | 44.7 |
|                                                                    | Post-operative  | 212   | 29.4 | 26.1   | 32.8 |
|                                                                    | Full            | 377   | 37.0 | 34.0   | 40.0 |
| <b>nausea <math>\geq 4/10</math> NRS</b>                           | Incomplete      | 688   | 21.2 | 19.8   | 22.6 |
|                                                                    | Intra-operative | 25    | 13.2 | 8.7    | 18.8 |
|                                                                    | Post-operative  | 142   | 19.7 | 16.8   | 22.8 |
|                                                                    | Full            | 133   | 13.1 | 11.0   | 15.3 |

| variable                                          | protocol group  | n     | %    | 95% CI |      |
|---------------------------------------------------|-----------------|-------|------|--------|------|
| <b>satisfaction ≤ 6/10 NRS</b>                    | Incomplete      | 1,124 | 34.6 | 32.9   | 36.2 |
|                                                   | Intra-operative | 36    | 18.9 | 13.6   | 25.3 |
|                                                   | Post-operative  | 122   | 16.9 | 14.2   | 19.8 |
|                                                   | Full            | 141   | 13.8 | 11.8   | 16.1 |
| <b>Would have liked to receive more treatment</b> | Incomplete      | 1,494 | 46.0 | 44.2   | 47.7 |
|                                                   | Intra-operative | 62    | 32.6 | 26.0   | 39.8 |
|                                                   | Post-operative  | 162   | 22.4 | 19.4   | 25.7 |
|                                                   | Full            | 255   | 25.0 | 22.4   | 27.8 |

## References

1. Sutton CD, Carvalho B Optimal Pain Management After Cesarean Delivery. *Anesthesiology Clinics* 2017; **35**: 107-24.
2. C-Section. Better Postoperative Pain Management (prospect). Available online: <https://archive.postoppain.org/> (accessed on 20, December, 2020 ).
3. Schug SA, Palmer GM, Scott DA, et al. *Acute Pain Management: Scientific Evidence (5th edition)*, ANZCA & FPM,, 5th edn. Melbourne, ANZCA & FPM, 2020.
4. Chou R, Gordon DB, de Leon-Casasola OA, et al. Management of Postoperative Pain: A Clinical Practice Guideline From the American Pain Society, the American Society of Regional Anesthesia and Pain Medicine, and the American Society of Anesthesiologists' Committee on Regional Anesthesia, Executive Committee, and Administrative Council. *Journal of Pain* 2016; **17**: 131-57.
5. Colvin, J.R., Pedon, C.J., (Eds.) Raising the Standard: A compendium of Audit Recipes for Continuous Quality Improvement in Anaesthesia; The Royal College of Anaesthetists: London, UK, 2012.
6. National Collaborating Centre for Women's and Children's Health. *Caesarean Section, NICE Clinical Guideline [CG132]*; Royal College of Obstetricians and Gynaecologists: London, UK, 2011..
7. Practice Guidelines for Obstetric Anesthesia: An Updated Report by the American Society of Anesthesiologists Task Force on Obstetric Anesthesia and the Society for Obstetric Anesthesia and Perinatology. *Anesthesiology* 2016; **124**: 270-300.
8. Grape S, Kirkham KR, Albrecht E Transversus abdominis plane block versus local anaesthetic wound infiltration for analgesia after caesarean section: A systematic review and meta-analysis with trial sequential analysis. *European Journal of Anaesthesiology* 2021.
9. Bamigboye AA, Hofmeyr GJ Local anaesthetic wound infiltration and abdominal nerves block during caesarean section for postoperative pain relief. *Cochrane Database Syst Rev* 2009: Cd006954.
10. Principles of Analgesic Use in the Treatment of Acute Pain and Chronic Cancer Pain, 4th ed.; Clinical Pharmacy; American Pain Society: Chicago, IL, USA, 1999.
11. Meissner, W. *Akutschmerz Taschenbuch (Acute Pain Pocket Book)*; Medizinisch Wissenschaftliche Verlagsgesellschaft: Berlin, Germany, 2014
