# Supplementary material for: Following Evidence-Based Recommendations for Perioperative Pain Management after Cesarean Section Is Associated with Better Pain-Related Outcomes: Analysis of Registry Data
Source: MDPI journal article supplement (doi:10.3390/jcm12020676), 2023-01-14
Supplement: s1 [file s1]

# SUPPLEMENT II

## Contents

|          |                                                                |          |
|----------|----------------------------------------------------------------|----------|
| <b>1</b> | <b>Descriptive statistics for the pain composite scores</b>    | <b>2</b> |
| <b>2</b> | <b>Model details: Total cohort</b>                             |          |
| 2.1      | Pain Composite Score: total                                    | 3        |
| 2.2      | Pain Composite Score: intensity sub-score                      | 4        |
| 2.3      | Pain Composite Score: interference sub-score                   | 5        |
| 2.4      | Pain Composite Score: side effects sub-score                   | 6        |
| <b>3</b> | <b>Sensitivity analysis for the total Pain Composite Score</b> | <b>7</b> |
| <b>4</b> | <b>Model details: Regional anaesthesia</b>                     |          |
| 4.1      | Pain Composite Score: total                                    | 9        |
| 4.2      | Pain Composite Score: intensity sub-score                      | 10       |
| 4.3      | Pain Composite Score: interference sub-score                   | 11       |
| 4.4      | Pain Composite Score: side effects sub-score                   | 12       |

# 1 Descriptive statistics for the pain composite scores

Descriptive statistics (mean and standard deviation, SD) of the pain composite scores (PCS) and sub-scores for pain intensity (PCS<sub>intensity</sub>), pain interference (PCS<sub>interference</sub>) and side effects (PCS<sub>side</sub>). Results are shown separately for the total cohort and women with regional anaesthesia (no general anaesthesia). In addition, the patient numbers (n) are shown.

| Variable                          | Care group      | Total cohort |      |       | Regional anaesthesia |      |       |
|-----------------------------------|-----------------|--------------|------|-------|----------------------|------|-------|
|                                   |                 | Mean         | SD   | n     | Mean                 | SD   | n     |
| <b>PCS<sub>total</sub></b>        | Incomplete      | 3.82         | 1.74 | 3,071 | 3.92                 | 1.77 | 2,509 |
|                                   | Intra-operative | 3.52         | 1.66 | 186   | 3.55                 | 1.65 | 167   |
|                                   | Post-operative  | 3.49         | 1.58 | 715   | 3.51                 | 1.56 | 603   |
|                                   | Full care       | 3.25         | 1.54 | 1,010 | 3.19                 | 1.52 | 934   |
| <b>PCS<sub>intensity</sub></b>    | Incomplete      | 5.02         | 2.05 | 3,071 | 5.19                 | 2.09 | 2,509 |
|                                   | Intra-operative | 4.39         | 2.04 | 186   | 4.37                 | 2.04 | 167   |
|                                   | Post-operative  | 4.01         | 1.77 | 715   | 3.99                 | 1.72 | 603   |
|                                   | Full care       | 3.98         | 1.94 | 1,010 | 3.88                 | 1.88 | 934   |
| <b>PCS<sub>interference</sub></b> | Incomplete      | 4.42         | 2.36 | 3,071 | 4.54                 | 2.40 | 2,509 |
|                                   | Intra-operative | 4.05         | 2.30 | 186   | 4.08                 | 2.35 | 167   |
|                                   | Post-operative  | 4.25         | 2.09 | 715   | 4.27                 | 2.05 | 603   |
|                                   | Full care       | 3.65         | 2.03 | 1,010 | 3.58                 | 2.01 | 934   |
| <b>PCS<sub>side</sub></b>         | Incomplete      | 2.16         | 2.10 | 3,071 | 2.20                 | 2.17 | 2,509 |
|                                   | Intra-operative | 2.20         | 2.06 | 186   | 2.27                 | 2.05 | 167   |
|                                   | Post-operative  | 2.14         | 1.98 | 715   | 2.21                 | 2.02 | 603   |
|                                   | Full care       | 2.19         | 1.96 | 1,010 | 2.19                 | 1.96 | 934   |

## 2 Model details: Total cohort

### 2.1 Pain Composite Score: total

Model parameter for the **total pain composite score** (PCS<sub>total</sub>, n = 4,982 patients). The PCS<sub>total</sub> was z-standardized before modelling. Significant regression coefficients are printed in bold (coefficient of determination:  $R^2_{\text{marginal}} = 0.025$ ,  $R^2_{\text{conditional}} = 0.216$ ).

| Variable                                 | [Reference/Unit]               | $\beta$ | 95%CI |       | p                |
|------------------------------------------|--------------------------------|---------|-------|-------|------------------|
| (Intercept)                              |                                | -0.27   | -0.59 | 0.06  | 0.114            |
| <b>Perioperative treatment protocol:</b> |                                |         |       |       |                  |
| Intra-operative                          | [vs. Incomplete]               | -0.27   | -0.42 | -0.11 | <b>&lt;0.001</b> |
| Post-operative                           | [vs. Incomplete]               | -0.07   | -0.19 | 0.04  | 0.216            |
| Full care                                | [vs. Incomplete]               | -0.36   | -0.49 | -0.23 | <b>&lt;0.001</b> |
| <b>Group:</b>                            |                                |         |       |       |                  |
| General anaesthesia (GA)                 | [vs. RA, regional anaesthesia] | 0.16    | 0.04  | 0.28  | <b>0.009</b>     |
| Combined GA + RA                         | [vs. RA]                       | 0.04    | -0.14 | 0.22  | 0.659            |
| Age                                      | [years]                        | 0.00    | -0.01 | 0.00  | 0.138            |
| Pre-existing chronic pain                | [vs. no]                       | 0.21    | 0.11  | 0.31  | <b>&lt;0.001</b> |
| Ward: any opioid                         | [vs. none]                     | 0.17    | 0.10  | 0.25  | <b>&lt;0.001</b> |
| Income level: high                       | [vs. others]                   | 0.32    | -0.07 | 0.70  | 0.120            |

Estimated marginal means (covariate adjusted means) and 95% confidence intervals of the PCS<sub>total</sub> (n = 4,982 patients). Results are shown for the peri-operative treatment protocol groups. The PCS<sub>total</sub> was z-standardized before modelling.

| Care group      | mean  | 95% CI |       |
|-----------------|-------|--------|-------|
| Incomplete      | 0.04  | -0.17  | 0.25  |
| Intra-operative | -0.23 | -0.47  | 0.02  |
| Post-operative  | -0.03 | -0.25  | 0.18  |
| Full care       | -0.32 | -0.54  | -0.09 |

Contrasts (differences of the estimated marginal means) and 95% confidence intervals for the **total pain composite score** (PCS<sub>total</sub>, n = 4,982 patients). Significant contrasts (p < 0.05) are printed in bold. The PCS<sub>total</sub> was z-standardized before modelling. Thus, differences can be interpreted as differences in standard deviations.

| contrast        |                     | estimate | 95% CI |       | p                |
|-----------------|---------------------|----------|--------|-------|------------------|
| Incomplete      | vs. Intra-operative | -0.27    | -0.42  | -0.11 | <b>0.002</b>     |
| Incomplete      | vs. Post-operative  | -0.07    | -0.19  | 0.04  | 0.432            |
| Incomplete      | vs. Full care       | -0.36    | -0.49  | -0.23 | <b>&lt;0.001</b> |
| Intra-operative | vs. Post-operative  | 0.19     | 0.03   | 0.36  | 0.064            |
| Intra-operative | vs. Full care       | -0.09    | -0.25  | 0.06  | 0.432            |
| Post-operative  | vs. Full care       | -0.28    | -0.40  | -0.17 | <b>&lt;0.001</b> |

## 2.2 Pain Composite Score: intensity sub-score

Model parameter for the **pain composite intensity sub-score** ( $PCS_{\text{intensity}}$ ,  $n = 4,982$  patients). The  $PCS_{\text{intensity}}$  was z-standardized before modelling. Significant regression coefficients are printed in bold (coefficient of determination:  $R^2_{\text{marginal}} = 0.025$ ,  $R^2_{\text{conditional}} = 0.249$ ).

| Variable                                 | [Reference/Unit]               | $\beta$ | 95%CI |       | p                |
|------------------------------------------|--------------------------------|---------|-------|-------|------------------|
| (Intercept)                              |                                | -0.45   | -0.78 | -0.11 | <b>0.013</b>     |
| <b>Perioperative treatment protocol:</b> |                                |         |       |       |                  |
| Intra-operative                          | [vs. Incomplete]               | -0.20   | -0.35 | -0.06 | <b>0.007</b>     |
| Post-operative                           | [vs. Incomplete]               | -0.05   | -0.16 | 0.07  | 0.428            |
| Full care                                | [vs. Incomplete]               | -0.18   | -0.30 | -0.05 | <b>0.006</b>     |
| <b>Group:</b>                            |                                |         |       |       |                  |
| General anaesthesia (GA)                 | [vs. RA, regional anaesthesia] | 0.16    | 0.04  | 0.27  | <b>0.007</b>     |
| Combined GA + RA                         | [vs. RA]                       | 0.09    | -0.08 | 0.26  | 0.315            |
| Age                                      | [years]                        | 0.00    | 0.00  | 0.01  | 0.206            |
| Pre-existing chronic pain                | [vs. no]                       | 0.15    | 0.06  | 0.25  | <b>0.002</b>     |
| Ward: any opioid                         | [vs. none]                     | 0.21    | 0.14  | 0.28  | <b>&lt;0.001</b> |
| Income level: high                       | [vs. others]                   | -0.04   | -0.45 | 0.36  | 0.843            |

Estimated marginal means (covariate adjusted means) and 95% confidence intervals of the **pain composite intensity sub-score** ( $PCS_{\text{intensity}}$ ,  $n = 4,982$  patients). Results are shown for the peri-operative treatment protocol groups. The  $PCS_{\text{intensity}}$  was z-standardized before modelling.

| group           | mean  | 95% CI |       |
|-----------------|-------|--------|-------|
| Incomplete      | -0.11 | -0.33  | 0.11  |
| Intra-operative | -0.31 | -0.56  | -0.06 |
| Post-operative  | -0.15 | -0.38  | 0.07  |
| Full care       | -0.29 | -0.52  | -0.06 |

Contrasts (differences of the estimated marginal means) and 95% confidence intervals for the **pain composite intensity sub-score** ( $PCS_{\text{intensity}}$ ,  $n = 4,982$  patients). Significant contrasts ( $p < 0.05$ ) are printed in bold. The  $PCS_{\text{intensity}}$  was z-standardized before modelling. Thus, differences can be interpreted as differences in standard deviations.

| contrast        |                     | estimate | 95% CI |       | p            |
|-----------------|---------------------|----------|--------|-------|--------------|
| Incomplete      | vs. Intra-operative | -0.20    | -0.35  | -0.06 | <b>0.036</b> |
| Incomplete      | vs. Post-operative  | -0.05    | -0.16  | 0.07  | 0.856        |
| Incomplete      | vs. Full care       | -0.18    | -0.30  | -0.05 | <b>0.036</b> |
| Intra-operative | vs. Post-operative  | 0.16     | 0.00   | 0.31  | 0.153        |
| Intra-operative | vs. Full care       | 0.02     | -0.13  | 0.17  | 0.856        |
| Post-operative  | vs. Full care       | -0.13    | -0.24  | -0.02 | 0.076        |

## 2.3 Pain Composite Score: interference sub-score

Model parameter for the **pain composite interference sub-score** ( $PCS_{\text{interference}}$ ,  $n = 4,982$  patients). The  $PCS_{\text{interference}}$  was z-standardized before modelling. Significant regression coefficients are printed in bold (coefficient of determination:  $R^2_{\text{marginal}} = 0.025$ ,  $R^2_{\text{conditional}} = 0.225$ ).

| Variable                                 | [Reference/Unit]               | $\beta$ | 95%CI |       | p                |
|------------------------------------------|--------------------------------|---------|-------|-------|------------------|
| (Intercept)                              |                                | -0.21   | -0.54 | 0.12  | 0.226            |
| <b>Perioperative treatment protocol:</b> |                                |         |       |       |                  |
| Intra-operative                          | [vs. Incomplete]               | -0.24   | -0.39 | -0.08 | <b>0.002</b>     |
| Post-operative                           | [vs. Incomplete]               | -0.07   | -0.19 | 0.05  | 0.240            |
| Full care                                | [vs. Incomplete]               | -0.35   | -0.49 | -0.22 | <b>&lt;0.001</b> |
| <b>Group:</b>                            |                                |         |       |       |                  |
| General anaesthesia (GA)                 | [vs. RA, regional anaesthesia] | 0.19    | 0.07  | 0.31  | <b>0.002</b>     |
| Combined GA + RA                         | [vs. RA]                       | 0.03    | -0.15 | 0.21  | 0.722            |
| Age                                      | [years]                        | 0.00    | -0.01 | 0.00  | 0.152            |
| Pre-existing chronic pain                | [vs. no]                       | 0.10    | 0.00  | 0.20  | 0.052            |
| Ward: any opioid                         | [vs. none]                     | 0.18    | 0.11  | 0.26  | <b>&lt;0.001</b> |
| Income level: high                       | [vs. others]                   | 0.38    | -0.01 | 0.78  | 0.071            |

Estimated marginal means (covariate adjusted means) and 95% confidence intervals of the **pain composite interference sub-score** ( $PCS_{\text{interference}}$ ,  $n = 4,982$  patients). Results are shown for the peri-operative treatment protocol groups. The  $PCS_{\text{interference}}$  was z-standardized before modelling.

| group           | mean  | 95% CI |       |
|-----------------|-------|--------|-------|
| Incomplete      | 0.09  | -0.13  | 0.31  |
| Intra-operative | -0.15 | -0.40  | 0.10  |
| Post-operative  | 0.02  | -0.20  | 0.24  |
| Full care       | -0.27 | -0.50  | -0.04 |

Contrasts (differences of the estimated marginal means) and 95% confidence intervals for the **pain composite interference sub-score** ( $PCS_{\text{interference}}$ ,  $n = 4,982$  patients). Significant contrasts ( $p < 0.05$ ) are printed in bold. The  $PCS_{\text{interference}}$  was z-standardized before modelling. Thus, differences can be interpreted as differences in standard deviations.

| contrast        |                     | estimate | 95% CI |       | p                |
|-----------------|---------------------|----------|--------|-------|------------------|
| Incomplete      | vs. Intra-operative | -0.24    | -0.39  | -0.08 | <b>0.010</b>     |
| Incomplete      | vs. Post-operative  | -0.07    | -0.19  | 0.05  | 0.297            |
| Incomplete      | vs. Full care       | -0.35    | -0.49  | -0.22 | <b>&lt;0.001</b> |
| Intra-operative | vs. Post-operative  | 0.17     | 0.00   | 0.33  | 0.143            |
| Intra-operative | vs. Full care       | -0.12    | -0.28  | 0.04  | 0.297            |
| Post-operative  | vs. Full care       | -0.28    | -0.40  | -0.17 | <b>&lt;0.001</b> |

## 2.4 Pain Composite Score: side effects sub-score

Model parameter for the **pain composite side effects sub-score** (PCS<sub>side</sub>, n = 4,982 patients). The PCS<sub>side</sub> was z-standardized before modelling. Significant regression coefficients are printed in bold (coefficient of determination:  $R^2_{\text{marginal}} = 0.018$ ,  $R^2_{\text{conditional}} = 0.075$ ).

| Variable                                 | [Reference/Unit]               | $\beta$ | 95%CI |       | p                |
|------------------------------------------|--------------------------------|---------|-------|-------|------------------|
| (Intercept)                              |                                | -0.03   | -0.26 | 0.20  | 0.804            |
| <b>Perioperative treatment protocol:</b> |                                |         |       |       |                  |
| Intra-operative                          | [vs. Incomplete]               | -0.17   | -0.32 | -0.01 | <b>0.038</b>     |
| Post-operative                           | [vs. Incomplete]               | -0.04   | -0.16 | 0.07  | 0.465            |
| Full care                                | [vs. Incomplete]               | -0.23   | -0.37 | -0.10 | <b>&lt;0.001</b> |
| <b>Group:</b>                            |                                |         |       |       |                  |
| General anaesthesia (GA)                 | [vs. RA, regional anaesthesia] | 0.02    | -0.11 | 0.14  | 0.787            |
| Combined GA + RA                         | [vs. RA]                       | -0.01   | -0.19 | 0.17  | 0.918            |
| Age                                      | [years]                        | -0.01   | -0.01 | 0.00  | <b>0.014</b>     |
| Pre-existing chronic pain                | [vs. no]                       | 0.28    | 0.18  | 0.38  | <b>&lt;0.001</b> |
| Ward: any opioid                         | [vs. none]                     | 0.02    | -0.06 | 0.09  | 0.621            |
| Income level: high                       | [vs. others]                   | 0.27    | 0.05  | 0.49  | <b>0.026</b>     |

Estimated marginal means (covariate adjusted means) and 95% confidence intervals of the **pain composite side effects sub-score** (PCS<sub>side</sub>, n = 4,982 patients). Results are shown for the peri-operative treatment protocol groups. The PCS<sub>side</sub> was z-standardized before modelling.

| group           | mean  | 95% CI |       |
|-----------------|-------|--------|-------|
| Incomplete      | 0.06  | -0.08  | 0.20  |
| Intra-operative | -0.10 | -0.30  | 0.09  |
| Post-operative  | 0.02  | -0.13  | 0.17  |
| Full care       | -0.17 | -0.33  | -0.01 |

Contrasts (differences of the estimated marginal means) and 95% confidence intervals for the **pain composite side effects sub-score** (PCS<sub>side</sub>, n = 4,982 patients). Significant contrasts ( $p < 0.05$ ) are printed in bold. The PCS<sub>side</sub> was z-standardized before modelling. Thus, differences can be interpreted as differences in standard deviations.

| contrast        |                     | estimate | 95% CI |       | p            |
|-----------------|---------------------|----------|--------|-------|--------------|
| Incomplete      | vs. Intra-operative | -0.17    | -0.32  | -0.01 | 0.152        |
| Incomplete      | vs. Post-operative  | -0.04    | -0.16  | 0.07  | 0.815        |
| Incomplete      | vs. Full care       | -0.23    | -0.37  | -0.10 | <b>0.003</b> |
| Intra-operative | vs. Post-operative  | 0.12     | -0.05  | 0.29  | 0.466        |
| Intra-operative | vs. Full care       | -0.07    | -0.23  | 0.09  | 0.815        |
| Post-operative  | vs. Full care       | -0.19    | -0.31  | -0.07 | <b>0.007</b> |

### 3 Sensitivity analysis for the total Pain Composite Score

**Sensitivity analysis excluding one hospital with a high patient number.** Results of the multi-level regression models using the pain composite score (0-10) as dependent variable. Regression coefficients ( $\beta$ ) including 95% confidence intervals (95%CI) and p-values (p) are shown. In addition, results for the patient sample with regional anaesthesia are shown. Significant p-values are printed in bold.

| variable                                   | reference                  | total cohort<br>[n = 3 041] |        |       |                   | regional anaesthesia<br>[n = 2 397] |        |       |                   |
|--------------------------------------------|----------------------------|-----------------------------|--------|-------|-------------------|-------------------------------------|--------|-------|-------------------|
|                                            |                            | $\beta$                     | 95% CI |       | p                 | $\beta$                             | 95% CI |       | p                 |
| (intercept)                                |                            | -0.16                       | -0.55  | 0.22  | 0.419             | -0.15                               | -0.62  | 0.31  | 0.527             |
| <b>Peri-operative care group:</b>          |                            |                             |        |       |                   |                                     |        |       |                   |
| Intra-operative [only]                     | [vs. Incomplete]           | -0.24                       | -0.43  | -0.06 | <b>0.009</b>      | -0.22                               | -0.42  | -0.02 | <b>0.028</b>      |
| Post-operative [only]                      | [vs. Incomplete]           | -0.09                       | -0.20  | 0.03  | 0.154             | -0.01                               | -0.14  | 0.13  | 0.917             |
| Full care                                  | [vs. Incomplete]           | -0.38                       | -0.52  | -0.25 | <b>&lt; 0.001</b> | -0.39                               | -0.54  | -0.24 | <b>&lt; 0.001</b> |
| <b>group:</b>                              |                            |                             |        |       |                   |                                     |        |       |                   |
| General anaesthesia                        | [vs. regional anaesthesia] | 0.28                        | 0.13   | 0.42  | <b>&lt; 0.001</b> | <i>not modelled</i>                 |        |       |                   |
| Combined RA & GA                           | [vs. regional anaesthesia] | 0.16                        | -0.08  | 0.39  | 0.196             |                                     |        |       |                   |
| <b>Age</b>                                 | [years]                    | -0.01                       | -0.01  | 0.00  | <b>0.030</b>      | -0.01                               | -0.02  | 0.00  | <b>0.032</b>      |
| <b>Pre-existing chronic pain: yes</b>      | [vs. no]                   | 0.27                        | 0.15   | 0.39  | <b>&lt; 0.001</b> | 0.23                                | 0.10   | 0.36  | <b>&lt; 0.001</b> |
| <b>Intra-operative: neuraxial morphine</b> | [vs. others/none]          | <i>not modelled</i>         |        |       |                   | -0.12                               | -0.23  | -0.01 | <b>0.032</b>      |
| <b>Ward: opioid</b>                        | [vs. no]                   | 0.18                        | 0.10   | 0.26  | <b>&lt; 0.001</b> | 0.23                                | 0.14   | 0.32  | <b>&lt; 0.001</b> |
| <b>Income level: high</b>                  | [vs. others]               | 0.50                        | 0.06   | 0.93  | <b>0.037</b>      | 0.49                                | 0.00   | 0.99  | 0.068             |

Estimated marginal means (EMM, z-scale) including 95% confidence intervals (CI) for the different multi-level models and models from sensitivity analysis. Pain composite scores served as dependent variables and covariates are listed at the end of the table.

| <b>Model I: total sample [n = 4 982]</b>                               |                        |              |       |
|------------------------------------------------------------------------|------------------------|--------------|-------|
| <b>Care group</b>                                                      | <b>EMM<sup>1</sup></b> | <b>95%CI</b> |       |
| Incomplete                                                             | 0.04                   | -0.17        | 0.25  |
| intra-operative (only)                                                 | -0.23                  | -0.47        | 0.02  |
| PACU/normal-ward (only)                                                | -0.03                  | -0.25        | 0.18  |
| Full Care                                                              | -0.32                  | -0.54        | -0.09 |
| <b>Model II: without one hospital [n = 3 041]</b>                      |                        |              |       |
| <b>Care group</b>                                                      | <b>EMM<sup>1</sup></b> | <b>95%CI</b> |       |
| Incomplete                                                             | 0.22                   | -0.03        | 0.46  |
| intra-operative (only)                                                 | -0.03                  | -0.31        | 0.26  |
| PACU/normal-ward (only)                                                | 0.13                   | -0.11        | 0.38  |
| Full Care                                                              | -0.17                  | -0.42        | 0.09  |
| <b>Model III: regional anaesthesia [n = 4 213]</b>                     |                        |              |       |
| <b>Care group</b>                                                      | <b>EMM<sup>2</sup></b> | <b>95%CI</b> |       |
| Incomplete                                                             | -0.13                  | -0.35        | 0.10  |
| intra-operative (only)                                                 | -0.36                  | -0.62        | -0.11 |
| PACU/normal-ward (only)                                                | -0.14                  | -0.37        | 0.09  |
| Full Care                                                              | -0.49                  | -0.73        | -0.26 |
| <b>Model IV: regional anaesthesia/without one hospital [n = 2 397]</b> |                        |              |       |
| <b>Care group</b>                                                      | <b>EMM<sup>2</sup></b> | <b>95%CI</b> |       |
| Incomplete                                                             | -0.01                  | -0.29        | 0.27  |
| intra-operative (only)                                                 | -0.23                  | -0.55        | 0.08  |
| PACU/normal-ward (only)                                                | -0.02                  | -0.30        | 0.26  |
| Full Care                                                              | -0.40                  | -0.69        | -0.12 |

<sup>1</sup> **adjusted for:** protocol of anaesthesia (regional anaesthesia vs. general anaesthesia vs. mixed protocols), chronic pre-existing pain (yes vs. no), age (years), opioid administration on the ward (yes vs. no), income level of the country (high vs. others), intra-operative use of dexamethasone (vs. no)

<sup>2</sup> **adjusted for:** chronic pre-existing pain (yes vs. no), age (years), opioid administration on the ward (yes vs. no), income level of the country (high vs. others), intra-operative use of neuraxial morphine (vs. no) and dexamethasone (vs. no)

Contrasts of the different multi-level models and multi-level models for sensitivity analysis for different sub-groups of peri-operative treatment protocol. Pain composite scores served as dependent variables. P-values were adjusted using the Bonferroni-Holm method. Significant p-values ( $p < 0.05$ ) are printed in bold.

|                            |                        | <b>Model</b>      |                   |                   |                   |
|----------------------------|------------------------|-------------------|-------------------|-------------------|-------------------|
|                            |                        | <b>I</b>          | <b>II</b>         | <b>III</b>        | <b>IV</b>         |
| <b>contrast</b>            |                        | <b>p</b>          | <b>p</b>          | <b>p</b>          | <b>p</b>          |
| <b>Incomplete vs.</b>      | <b>Intra-operative</b> | <b>0.002</b>      | <b>0.037</b>      | <b>0.021</b>      | 0.114             |
| <b>Incomplete vs</b>       | <b>Post-operative</b>  | 0.412             | 0.263             | 0.837             | 0.917             |
| <b>Incomplete vs</b>       | <b>Full care</b>       | <b>&lt; 0.001</b> | <b>&lt; 0.001</b> | <b>&lt; 0.001</b> | <b>&lt; 0.001</b> |
| <b>Intra-operative vs.</b> | <b>Post-operative</b>  | 0.065             | 0.263             | <b>0.045</b>      | 0.114             |
| <b>Intra-operative vs.</b> | <b>Full care</b>       | 0.412             | 0.263             | 0.261             | 0.121             |
| <b>Post-operative vs.</b>  | <b>Full care</b>       | <b>&lt; 0.001</b> | <b>&lt; 0.001</b> | <b>&lt; 0.001</b> | <b>&lt; 0.001</b> |



## 4 Model details: Regional anaesthesia

### 4.1 Pain Composite Score: total

Model parameter for the **total pain composite score** (PCS<sub>total</sub>, n = 4,213 patients). The PCS<sub>total</sub> was z-standardized before modelling. Significant regression coefficients are printed in bold (coefficient of determination:  $R^2_{\text{marginal}} = 0.035$ ,  $R^2_{\text{conditional}} = 0.236$ ).

| Variable                                 | [Reference/Unit] | $\beta$ | 95%CI |       | p                |
|------------------------------------------|------------------|---------|-------|-------|------------------|
| (Intercept)                              |                  | -0.30   | -0.66 | 0.07  | 0.125            |
| <b>Perioperative treatment protocol:</b> |                  |         |       |       |                  |
| Intra-operative                          | [vs. Incomplete] | -0.24   | -0.40 | -0.07 | <b>0.005</b>     |
| Post-operative                           | [vs. Incomplete] | -0.01   | -0.15 | 0.12  | 0.837            |
| Full care                                | [vs. Incomplete] | -0.36   | -0.51 | -0.22 | <b>&lt;0.001</b> |
| Age                                      | [years]          | 0.00    | -0.01 | 0.00  | 0.266            |
| Pre-existing chronic pain                | [vs. no]         | 0.17    | 0.07  | 0.28  | <b>0.002</b>     |
| Intra-operative neuraxial morphine: yes  | [vs. no]         | -0.16   | -0.27 | -0.05 | <b>0.004</b>     |
| Ward: any opioid                         | [vs. none]       | 0.20    | 0.12  | 0.28  | <b>&lt;0.001</b> |
| Income level: high                       | [vs. others]     | 0.31    | -0.11 | 0.73  | 0.162            |

Estimated marginal means (covariate adjusted means) and 95% confidence intervals of the **total pain composite score** (n = 4,213 patients). Results are shown for the peri-operative treatment protocol groups. The PCS<sub>total</sub> was z-standardized before modelling.

| group           | mean  | 95% CI |       |
|-----------------|-------|--------|-------|
| Incomplete      | -0.13 | -0.35  | 0.10  |
| Intra-operative | -0.36 | -0.62  | -0.11 |
| Post-operative  | -0.14 | -0.37  | 0.09  |
| Full care       | -0.49 | -0.73  | -0.26 |

Contrasts (differences of the estimated marginal means) and 95% confidence intervals for the **total pain composite score** (PCS<sub>total</sub>, n = 4,213 patients). Significant contrasts (p < 0.05) are printed in bold. The PCS<sub>total</sub> was z-standardized before modelling. Thus, differences can be interpreted as differences in standard deviations.

| contrast        |     |                 | estimate | 95% CI |       | p            |
|-----------------|-----|-----------------|----------|--------|-------|--------------|
| Incomplete      | vs. | Intra-operative | -0.24    | -0.40  | -0.07 | <b>0.021</b> |
| Incomplete      | vs. | Post-operative  | -0.01    | -0.15  | 0.12  | 0.837        |
| Incomplete      | vs. | Full care       | -0.36    | -0.51  | -0.22 | <b>0.000</b> |
| Intra-operative | vs. | Post-operative  | 0.22     | 0.04   | 0.40  | <b>0.045</b> |
| Intra-operative | vs. | Full care       | -0.13    | -0.29  | 0.04  | 0.261        |
| Post-operative  | vs. | Full care       | -0.35    | -0.47  | -0.22 | <b>0.000</b> |

## 4.2 Pain Composite Score: intensity sub-score

Model parameter for the **pain composite intensity sub-score** (PCS<sub>intensity</sub>, n = 4,213 patients). The PCS<sub>intensity</sub> was z-standardized before modelling. Significant regression coefficients are printed in bold (coefficient of determination: R<sup>2</sup><sub>marginal</sub> = 0.057, R<sup>2</sup><sub>conditional</sub> = 0.295).

| Variable                                 | [Reference/Unit] | $\beta$ | 95%CI |       | p                |
|------------------------------------------|------------------|---------|-------|-------|------------------|
| (Intercept)                              |                  | -0.47   | -0.85 | -0.09 | <b>0.023</b>     |
| <b>Perioperative treatment protocol:</b> |                  |         |       |       |                  |
| Intra-operative                          | [vs. Incomplete] | -0.13   | -0.28 | 0.03  | 0.109            |
| Post-operative                           | [vs. Incomplete] | -0.01   | -0.13 | 0.12  | 0.926            |
| Full care                                | [vs. Incomplete] | -0.15   | -0.29 | -0.02 | <b>0.029</b>     |
| Age                                      | [years]          | 0.01    | 0.00  | 0.01  | <b>0.049</b>     |
| Pre-existing chronic pain                | [vs. no]         | 0.11    | 0.01  | 0.21  | <b>0.029</b>     |
| Intra-operative neuraxial morphine: yes  | [vs. no]         | -0.33   | -0.43 | -0.23 | <b>&lt;0.001</b> |
| Ward: any opioid                         | [vs. none]       | 0.22    | 0.14  | 0.30  | <b>&lt;0.001</b> |
| Income level: high                       | [vs. others]     | -0.04   | -0.49 | 0.40  | 0.847            |

Estimated marginal means (covariate adjusted means) and 95% confidence intervals of the **pain composite intensity sub-score** (PCS<sub>intensity</sub>, n = 4,213 patients). Results are shown for the peri-operative treatment protocol groups. The PCS<sub>intensity</sub> was z-standardized before modelling.

| group           | mean  | 95% CI |       |
|-----------------|-------|--------|-------|
| Incomplete      | -0.33 | -0.56  | -0.09 |
| Intra-operative | -0.46 | -0.72  | -0.19 |
| Post-operative  | -0.33 | -0.58  | -0.09 |
| Full care       | -0.48 | -0.73  | -0.24 |

Contrasts (differences of the estimated marginal means) and 95% confidence intervals for the **pain composite intensity sub-score** (PCS<sub>intensity</sub>, n = 4,213 patients). Significant contrasts (p < 0.05) are printed in bold. The PCS<sub>intensity</sub> was z-standardized before modelling. Thus, differences can be interpreted as differences in standard deviations.

| contrast        |                     | estimate | 95% CI |       | p     |
|-----------------|---------------------|----------|--------|-------|-------|
| Incomplete      | vs. Intra-operative | -0.13    | -0.28  | 0.03  | 0.435 |
| Incomplete      | vs. Post-operative  | -0.01    | -0.13  | 0.12  | 0.999 |
| Incomplete      | vs. Full care       | -0.15    | -0.29  | -0.02 | 0.145 |
| Intra-operative | vs. Post-operative  | 0.12     | -0.05  | 0.29  | 0.473 |
| Intra-operative | vs. Full care       | -0.02    | -0.18  | 0.13  | 0.999 |
| Post-operative  | vs. Full care       | -0.15    | -0.27  | -0.03 | 0.094 |

### 4.3 Pain Composite Score: interference sub-score

Model parameter for the **pain composite interference sub-score** (PCS<sub>interference</sub>, n = 4,213 patients). The PCS<sub>interference</sub> was z-standardized before modelling. Significant regression coefficients are printed in bold (coefficient of determination: R<sup>2</sup><sub>marginal</sub> = 0.05, R<sup>2</sup><sub>conditional</sub> = 0.242).

| Variable                                 | [Reference/Unit] | $\beta$ | 95%CI |       | p                |
|------------------------------------------|------------------|---------|-------|-------|------------------|
| (Intercept)                              |                  | -0.22   | -0.58 | 0.15  | 0.254            |
| <b>Perioperative treatment protocol:</b> |                  |         |       |       |                  |
| Intra-operative                          | [vs. Incomplete] | -0.17   | -0.34 | -0.01 | <b>0.042</b>     |
| Post-operative                           | [vs. Incomplete] | -0.03   | -0.17 | 0.10  | 0.647            |
| Full care                                | [vs. Incomplete] | -0.34   | -0.49 | -0.20 | <b>&lt;0.001</b> |
| Age                                      | [years]          | 0.00    | -0.01 | 0.00  | 0.456            |
| Pre-existing chronic pain                | [vs. no]         | 0.07    | -0.04 | 0.17  | 0.215            |
| Intra-operative neuraxial morphine: yes  | [vs. no]         | -0.37   | -0.48 | -0.26 | <b>&lt;0.001</b> |
| Ward: any opioid                         | [vs. none]       | 0.18    | 0.10  | 0.26  | <b>&lt;0.001</b> |
| Income level: high                       | [vs. others]     | 0.41    | -0.01 | 0.83  | 0.068            |

Estimated marginal means (covariate adjusted means) and 95% confidence intervals of the **pain composite interference sub-score** (PCS<sub>interference</sub>, n = 4,213 patients). Results are shown for the peri-operative treatment protocol groups. The PCS<sub>interference</sub> was z-standardized before modelling.

| group           | mean  | 95% CI |       |
|-----------------|-------|--------|-------|
| Incomplete      | -0.14 | -0.36  | 0.09  |
| Intra-operative | -0.31 | -0.57  | -0.05 |
| Post-operative  | -0.17 | -0.40  | 0.06  |
| Full care       | -0.48 | -0.71  | -0.25 |

Contrasts (differences of the estimated marginal means) and 95% confidence intervals for the **pain composite interference sub-score** (PCS<sub>interference</sub>, n = 4,213 patients). Significant contrasts (p < 0.05) are printed in bold. The PCS<sub>interference</sub> was z-standardized before modelling. Thus, differences can be interpreted as differences in standard deviations.

| contrast        |                     | estimate | 95% CI |       | p                |
|-----------------|---------------------|----------|--------|-------|------------------|
| Incomplete      | vs. Intra-operative | -0.17    | -0.34  | -0.01 | 0.166            |
| Incomplete      | vs. Post-operative  | -0.03    | -0.17  | 0.10  | 0.647            |
| Incomplete      | vs. Full care       | -0.34    | -0.49  | -0.20 | <b>&lt;0.001</b> |
| Intra-operative | vs. Post-operative  | 0.14     | -0.04  | 0.32  | 0.247            |
| Intra-operative | vs. Full care       | -0.17    | -0.34  | 0.00  | 0.166            |
| Post-operative  | vs. Full care       | -0.31    | -0.44  | -0.19 | <b>&lt;0.001</b> |

#### 4.4 Pain Composite Score: side effects sub-score

Model parameter for the **pain composite side effects sub-score** (PCS<sub>side</sub>, n = 4,213 patients). The PCS<sub>side</sub> was z-standardized before modelling. Significant regression coefficients are printed in bold (coefficient of determination:  $R^2_{\text{marginal}} = 0.035$ ,  $R^2_{\text{conditional}} = 0.083$ ).

| Variable                                 | [Reference/Unit] | $\beta$ | 95%CI |       | p                |
|------------------------------------------|------------------|---------|-------|-------|------------------|
| (Intercept)                              |                  | -0.06   | -0.30 | 0.19  | 0.643            |
| <b>Perioperative treatment protocol:</b> |                  |         |       |       |                  |
| Intra-operative                          | [vs. Incomplete] | -0.23   | -0.40 | -0.06 | <b>0.008</b>     |
| Post-operative                           | [vs. Incomplete] | 0.02    | -0.11 | 0.15  | 0.771            |
| Full care                                | [vs. Incomplete] | -0.27   | -0.41 | -0.13 | <b>&lt;0.001</b> |
| Age                                      | [years]          | -0.01   | -0.01 | 0.00  | <b>0.003</b>     |
| Pre-existing chronic pain                | [vs. no]         | 0.25    | 0.14  | 0.36  | <b>&lt;0.001</b> |
| Intra-operative neuraxial morphine: yes  | [vs. no]         | 0.36    | 0.26  | 0.47  | <b>&lt;0.001</b> |
| Ward: any opioid                         | [vs. none]       | 0.07    | -0.01 | 0.16  | 0.084            |
| Income level: high                       | [vs. others]     | 0.20    | -0.01 | 0.42  | 0.081            |

Estimated marginal means (covariate adjusted means) and 95% confidence intervals of the **pain composite side effects sub-score** (PCS<sub>side</sub>, n = 4,213 patients). Results are shown for the peri-operative treatment protocol groups. The PCS<sub>side</sub> was z-standardized before modelling.

| group           | mean  | 95% CI |      |
|-----------------|-------|--------|------|
| Incomplete      | 0.12  | -0.01  | 0.26 |
| Intra-operative | -0.10 | -0.29  | 0.08 |
| Post-operative  | 0.14  | 0.00   | 0.29 |
| Full care       | -0.15 | -0.30  | 0.00 |

Contrasts (differences of the estimated marginal means) and 95% confidence intervals for the **pain composite side effects sub-score** (PCS<sub>side</sub>, n = 4,213 patients). Significant contrasts ( $p < 0.05$ ) are printed in bold. The PCS<sub>side</sub> was z-standardized before modelling. Thus, differences can be interpreted as differences in standard deviations.

| contrast        |                     | estimate | 95% CI |       | p                |
|-----------------|---------------------|----------|--------|-------|------------------|
| Incomplete      | vs. Intra-operative | -0.23    | -0.40  | -0.06 | <b>0.031</b>     |
| Incomplete      | vs. Post-operative  | 0.02     | -0.11  | 0.15  | 0.999            |
| Incomplete      | vs. Full care       | -0.27    | -0.41  | -0.13 | <b>&lt;0.001</b> |
| Intra-operative | vs. Post-operative  | 0.25     | 0.06   | 0.43  | <b>0.031</b>     |
| Intra-operative | vs. Full care       | -0.04    | -0.21  | 0.12  | 0.999            |
| Post-operative  | vs. Full care       | -0.29    | -0.42  | -0.17 | <b>&lt;0.001</b> |
